# Supplementary material for: A rhesus macaque model of Asian-lineage Zika virus infection
Source: PubMed Central journal article supplement (PMC4931337; doi:10.1038/ncomms12204), 2016-06-28
Supplement: ncomms12204-s1.pdf [file ncomms12204-s1.pdf]

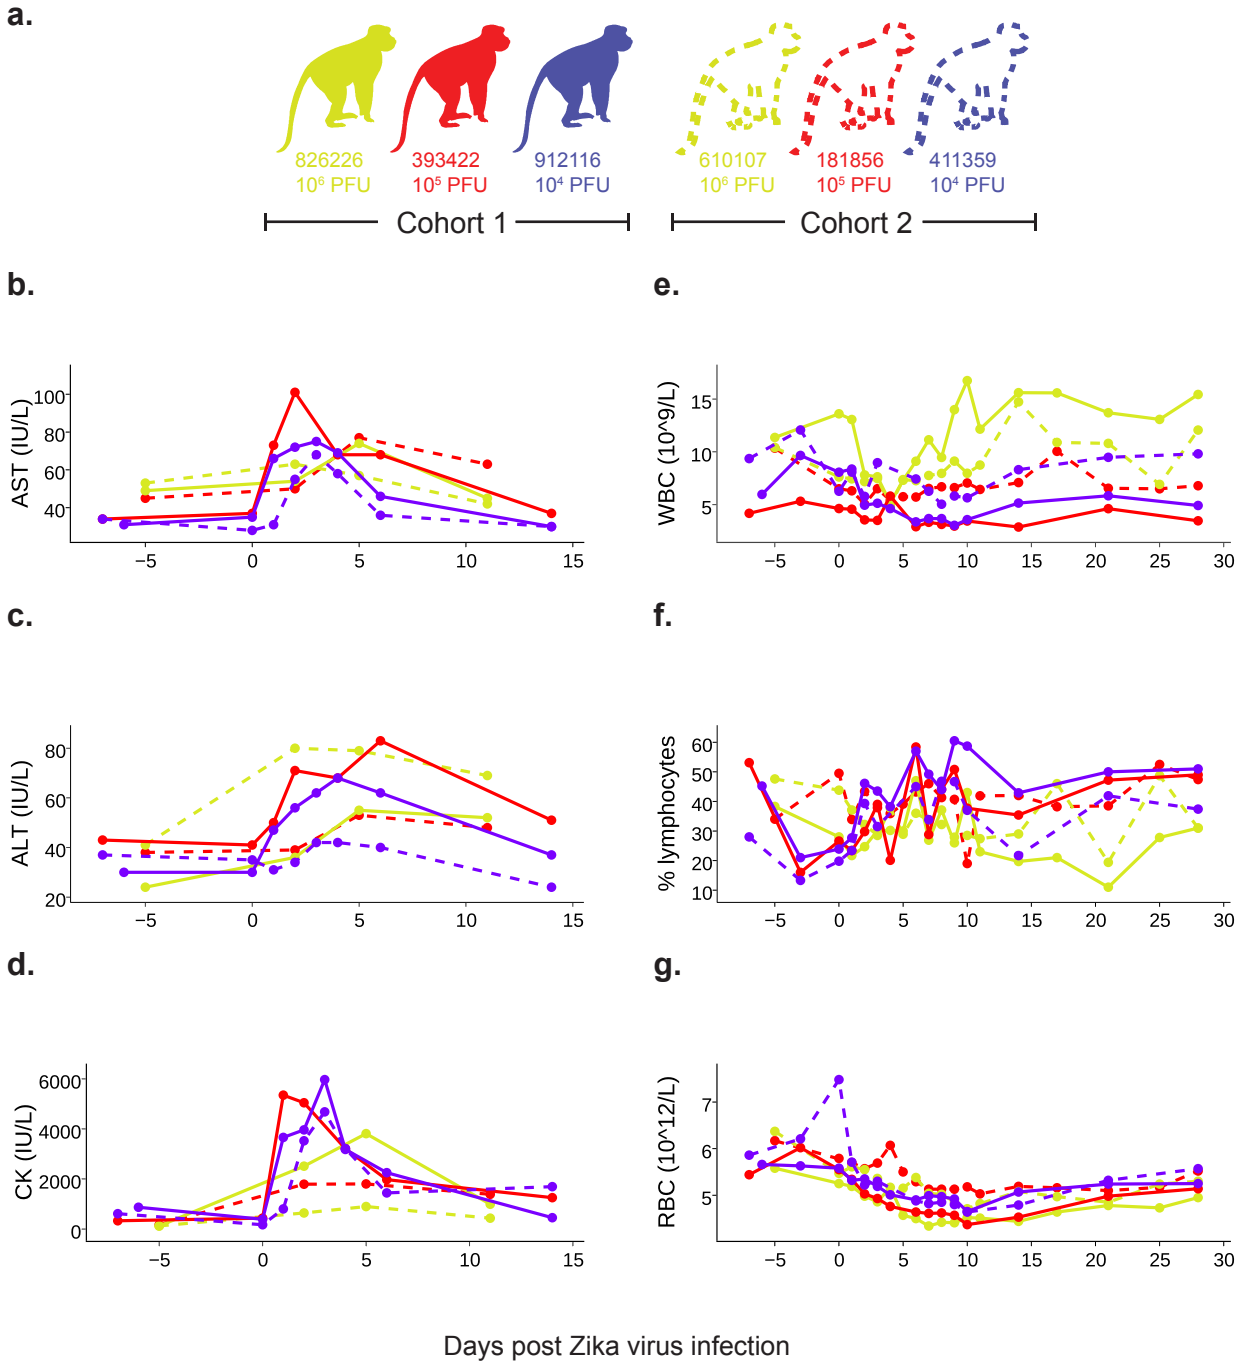

**Supplementary Figure 1| Complete blood counts and serum chemistries for macaques infected with ZIKV. a.**

Animals were infected with different doses of ZIKV. Cohort 1 animals are represented by solid lines and cohort 2 animals are represented by dotted lines. All non-pregnant animals had serum chemistry analysis performed at -7, 0, 1, 2, 3, 4, 6, and 14 dpi or at -6, 2, 5 and 11 dpi. **b.** AST blood chemistries **c.** ALT serum chemistries. **d.** CK serum chemistries. Complete blood counts were measured prior to infection, daily for 10-11 days after infection and then every 3-7 days until 28 dpi. **e.** white blood cell counts. **f.** % lymphocytes. **g.** red blood cell counts.

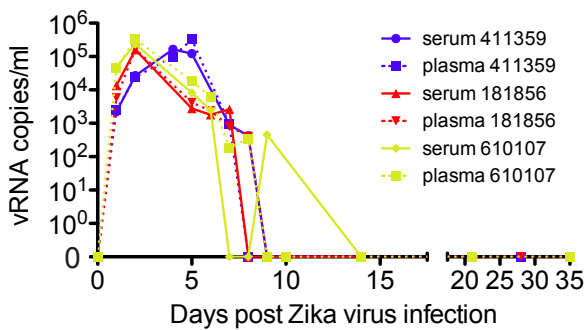

**Supplementary Figure 2| qRT-PCR detection of ZIKV RNA is equally sensitive from serum and plasma.** vRNA copies/ml of plasma or serum were quantitated by qRT-PCR over multiple time points from cohort 2 animals. Sufficient baseline samples were not available from serum.

**a.** Animal #411359

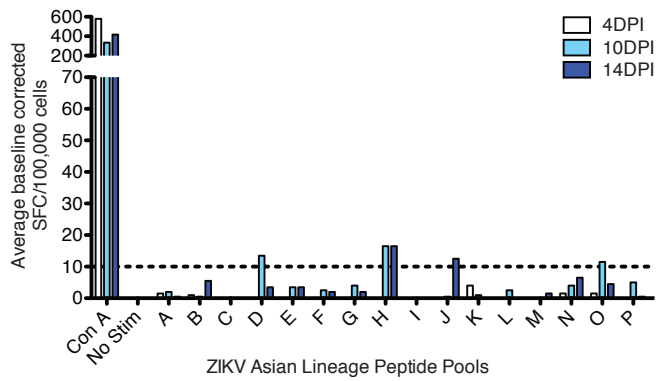

Animal #181856

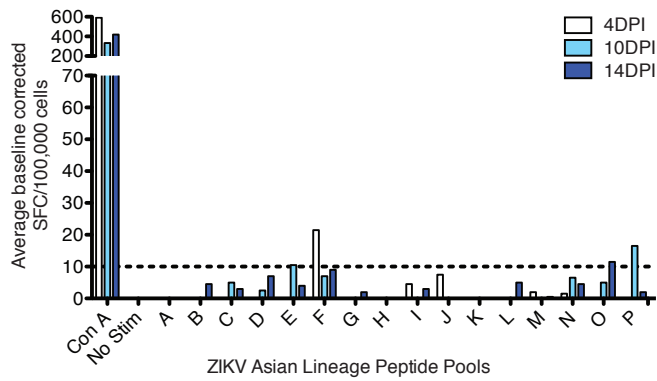

Animal #610107

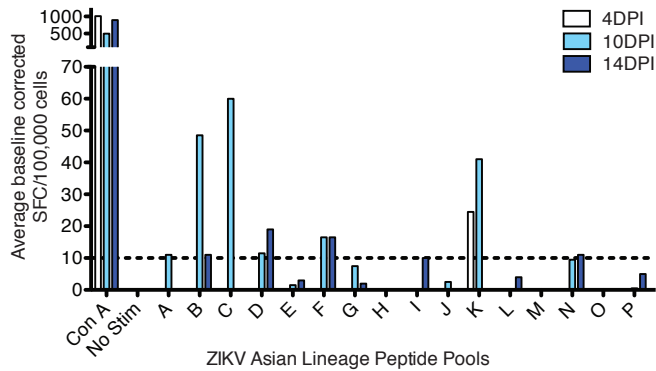

**b.** Asian lineage ZIKV peptide pools

| Pool ID | Target sequence                |
|---------|--------------------------------|
| A       | ZIKV Asian lineage NS5 1-51    |
| B       | ZIKV Asian lineage NS5 41-91   |
| C       | ZIKV Asian lineage NS5 81-131  |
| D       | ZIKV Asian lineage NS5 121-171 |
| E       | ZIKV Asian lineage NS5 161-211 |
| F       | ZIKV Asian lineage NS5 201-251 |
| G       | ZIKV Asian lineage NS5 241-291 |
| H       | ZIKV Asian lineage NS5 281-331 |
| I       | ZIKV Asian lineage NS5 321-371 |
| J       | ZIKV Asian lineage NS5 361-411 |
| K       | ZIKV Asian lineage NS5 401-451 |
| L       | ZIKV Asian lineage NS5 441-491 |
| M       | ZIKV Asian lineage NS5 481-531 |
| N       | ZIKV Asian lineage NS5 521-571 |
| O       | ZIKV Asian lineage NS5 561-611 |
| P       | ZIKV Asian lineage NS5 601-651 |

**c.** Summary of NS5-specific T cell responses

| Animal ID | MHC Haplotype            | DPI | Pool ID | Target Sequence               |                               |
|-----------|--------------------------|-----|---------|-------------------------------|-------------------------------|
| 411359    | A004, A023, B012b, B024a | 10  | D       | ZIKV Asian NS5 121-171        |                               |
|           |                          |     | H       | <b>ZIKV Asian NS5 281-331</b> |                               |
|           |                          |     | O       | ZIKV Asian NS5 561-575        |                               |
| 181856    | A001, A004, B012b, B055  | 4   | F       | ZIKV Asian NS5 201-251        |                               |
|           |                          |     | 10      | P                             | ZIKV Asian NS5 601-651        |
|           |                          |     | 14      | O                             | ZIKV Asian NS5 561-575        |
| 610107    | A004, A023, B012b, B048  | 4   | K       | <b>ZIKV Asian NS5 401-451</b> |                               |
|           |                          |     | 10      | A                             | ZIKV Asian NS5 1-51           |
|           |                          |     |         | B                             | <b>ZIKV Asian NS5 41-91</b>   |
|           |                          | C   |         | ZIKV Asian NS5 81-131         |                               |
|           |                          | D   |         | <b>ZIKV Asian NS5 121-171</b> |                               |
|           |                          | F   |         | <b>ZIKV Asian NS5 201-251</b> |                               |
|           |                          | K   |         | <b>ZIKV Asian NS5 401-451</b> |                               |
|           |                          | 14  |         | B                             | <b>ZIKV Asian NS5 41-91</b>   |
|           |                          |     |         | D                             | <b>ZIKV Asian NS5 121-171</b> |
|           |                          |     | F       | <b>ZIKV Asian NS5 201-251</b> |                               |
|           |                          |     | I       | ZIKV Asian NS5 321-371        |                               |
| N         | ZIKV Asian NS5 521-571   |     |         |                               |                               |

**Supplementary Figure 3| Antigen-specific T cell responses by IFN $\gamma$ -ELISPOT.** **a.** Average spot forming cell counts for PBMC collected from each animal at 4, 10 and 14 dpi. Data were baseline corrected by subtracting the average negative control values from each response. A threshold of 10.0 SFC/100,000 cells was set as the minimum value to be considered a positive T cell response, as indicated by the dashed line. **b.** Each pool was comprised of 10 overlapping 15mer peptides offset by 4 amino acids. **c.** Peptide pools eliciting T cell responses at 4, 10 and 14 dpi for each animal. The region of the NS5 protein that is represented by each pool of overlapping 15mers is provided. MHC class I haplotypes of each cohort 2 animal are also presented. All three animals shared the A004 and B012b major histocompatibility complex haplotypes and two animals shared the A023 haplotype. Therefore, it was not surprising that 3 pools were recognized by 2 different animals likely sharing the MHC class I allele that is presenting one of the peptides in those pools. Grayed pools were positive in more than one animal and bolded pools were positive at more than one time point in the same animal.

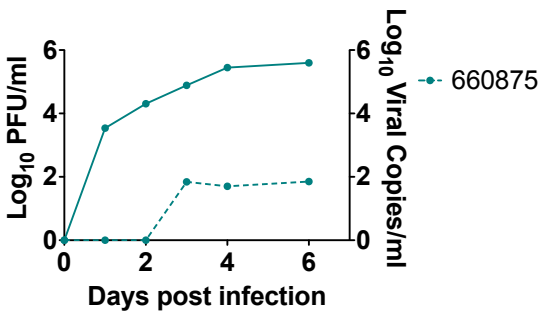

**Supplementary Figure 4| Plaque assay titers in a pregnant animal.** Log<sub>10</sub> PFU/ml serum (dotted line) is plotted relative to vRNA copies/ml plasma (solid line) for 660875.

Supplementary Table 1| Nucleotide variants in ZIKV challenge stock used to infect rhesus macaques

| Site relative to KJ776791 | Change | Amino Acid Change | Codon Change | Protein Effect | Variant Frequency |
|---------------------------|--------|-------------------|--------------|----------------|-------------------|
| 801                       | T -> C | F->L              | UUC->CUC     | Substitution   | 17.9%             |
| 2318                      | C -> T |                   | CUC->CUT     | None           | 18.7%             |
| 2863                      | T -> C | L->P              | CUC->CCC     | Substitution   | 7.7%              |
| 3223                      | A -> T | K->I              | AAA->ATA     | Substitution   | 10.5%             |
| 3475                      | T -> C | M->T              | AUG->ACG     | Substitution   | 7.9%              |
| 3740                      | C -> T |                   | GUC->GUT     | None           | 11.1%             |
| 3835                      | C -> T | A->V              | GCG->GTG     | Substitution   | 15.8%             |
| 4242                      | G -> C | E->Q              | GAG->CAG     | Substitution   | 40.9%             |

\*Only variants found in >5% of sequences are shown.
