# Supplementary material for: A rhesus macaque model of Asian-lineage Zika virus infection
Source: PubMed Central journal article supplement (PMC4931337; doi:10.1038/ncomms12204), 2016-06-28
Supplement: ncomms12204-s2.pdf [file ncomms12204-s2.pdf]

Editorial Note: This manuscript has been previously reviewed at another journal that is not operating a transparent peer review scheme.
